# Supplementary material for: Antifungal Activity of Linear and Disulfide-Cyclized Ultrashort Cationic Lipopeptides Alone and in Combination with Fluconazole Against Vulvovaginal Candida spp.
Source: Research Square preprint supplement (doi:10.21203/rs.3.rs-440442/v1), 2021-04-21
Supplement: Supplementary file 1 [file c3110f14476f4e08a7d24ddd.docx]

+ = FICA + FICB = FIC,

FIC index =
